# Supplementary material for: A room temperature continuous-wave nanolaser using colloidal quantum wells
Source: PubMed Central journal article supplement (PMC5529567; doi:10.1038/s41467-017-00198-z), 2017-07-26
Supplement: 41467_2017_198_MOESM1_ESM.pdf [file 41467_2017_198_MOESM1_ESM.pdf]

File name: Supplementary Information

Description: Supplementary Figures, Supplementary Notes and Supplementary References

File name: Peer Review File

Description:

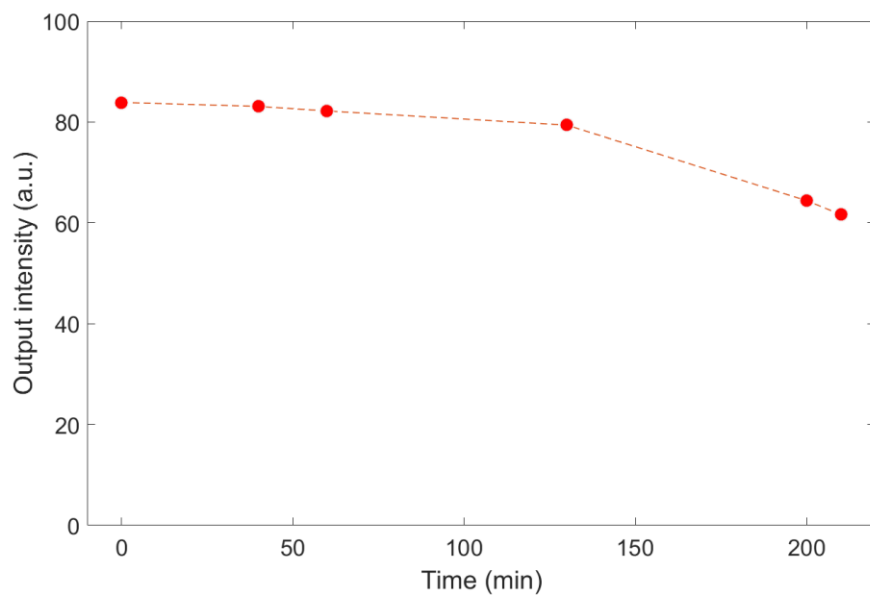

**Supplementary Figure 1. | Device photostability.** Device output intensity from Lorentzian fit of the cavity mode as a function of time.

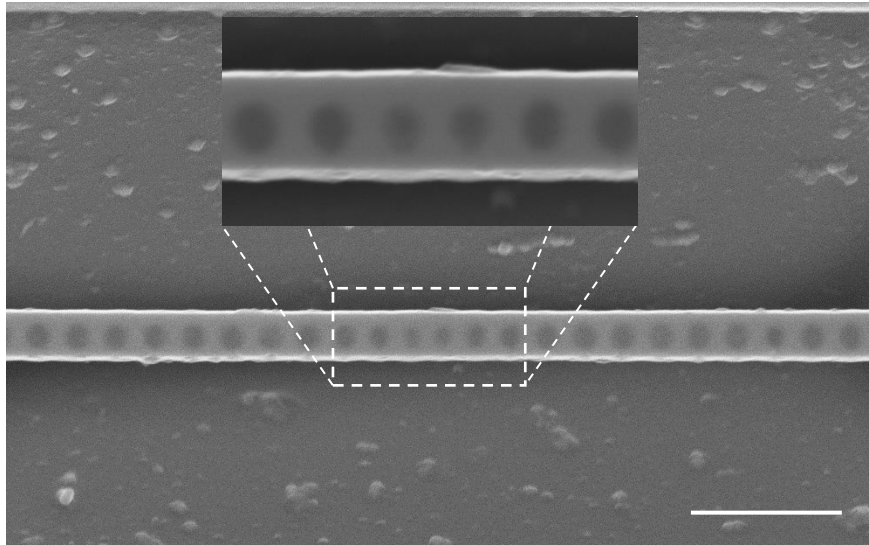

**Supplementary Figure 2. | Deposition of nanoplatelets.** Scanning-electron-microscope image of a nanobeam cavity after deposition of nanoplatelets from solution. Scale bar is 1  $\mu\text{m}$ . The inset shows the centre region indicated by the dashed square at higher magnification. The semitransparent area of holes indicates that the nanoplatelet film uniformly covers the entire nanobeam cavity.

### Supplementary Note 1: Coupling efficiency estimation

We define the Purcell factor as  $F = \frac{\tau_{\text{sub}}}{\tau_{\text{c}}} = \frac{\gamma_{\text{c}}}{\gamma_{\text{sub}}}$ , where  $\tau_{\text{sub}}$  is the lifetime of nanoplatelets

on the un-patterned substrate,  $\tau_{\text{c}}$  is the lifetime of nanoplatelets coupled to the cavity,

$\gamma_{\text{c}} = \frac{1}{\tau_{\text{c}}}$  is the decay rate of a nanoplatelet in the cavity, and  $\gamma_{\text{sub}} = \frac{1}{\tau_{\text{sub}}}$  is the decay rate

on the un-patterned substrate. The spontaneous emission coupling efficiency is given by

$\beta = 1 - \gamma_{\text{leak}} / \gamma_{\text{c}}$ , where  $\gamma_{\text{c}} = \gamma_{\text{cav}} + \gamma_{\text{leak}}$ ; here,  $\gamma_{\text{cav}}$  is the nanoplatelet decay rate into the

cavity mode and  $\gamma_{\text{leak}}$  is the decay rate of the nanoplatelets into all other radiative and non-

radiative channels. An emitter inside of a cavity will typically experience Purcell enhancement

when coupled to the cavity,<sup>2</sup> and Purcell suppression when decoupled (either due to detuning

or poor spectral matching with the cavity),<sup>3</sup> which means that  $\gamma_{\text{leak}} < \gamma_{\text{sub}}$ . In this case

$F < \frac{\gamma_{\text{c}}}{\gamma_{\text{leak}}}$  and thus  $\beta > 1 - 1/F$ .

### Supplementary Note 2: Rate equation analysis

To extract the spontaneous emission coupling efficiency  $\beta$  and the threshold  $P_{\text{th}}$  of the laser,

we use a standard coupled rate-equation model for the carrier density  $N$  and the cavity photon

number  $p$  of a semiconductor laser diode, modified from the work by G. Björk and Y.

Yamamoto.<sup>1</sup> We use the coupled rate equations

$$\frac{d}{dt} N = \frac{\eta_{\text{in}} P_{\text{in}}}{\hbar \omega_{\text{p}} V} - \frac{N}{\tau_{\text{sp}}} - \frac{N}{\tau_{\text{nr}}} - \frac{gp}{V} \quad (1)$$

$$\frac{d}{dt} p = -(\gamma - g)p + \frac{\beta V}{\tau_{\text{sp}}} N \quad (2)$$

where  $P_{\text{in}}$  is the optical power of the pump laser,  $\eta_{\text{in}}$  is the fraction of incident optical

pump power absorbed by the gain material,  $\hbar \omega_{\text{p}}$  is the photon energy of the pump laser,  $V$

is the volume of the gain medium,  $\tau_{\text{sp}}$  and  $\tau_{\text{nr}}$  are the exciton radiative and nonradiative

lifetimes respectively, and  $g = g'(N - N_0)$  is the material gain, assumed to be linearly proportional to the carrier density, where  $g' = \beta V / \tau_{sp}$  is a material constant and  $N_0$  is the transparency carrier density of the material. The cavity photon number is  $p = P_{out} / \hbar \omega \gamma \eta_{out}$ , where  $P_{out}$  is the output power onto the detector,  $\omega$  is the cavity resonance frequency,  $\eta_{out}$  is the laser output collection efficiency,  $\gamma = \omega / Q$  is the cavity decay rate, and  $\beta$  is the spontaneous emission coupling efficiency. The detected electron number on the CCD is linearly proportional to the output power ( $n_{ccd} = k P_{out}$ ). Thus, we have  $p = \alpha n_{ccd}$ , where  $\alpha = 1 / k \hbar \omega \gamma \eta_{out}$ .

The steady-state solution to the above rate equations is

$$P_{in} = \frac{\hbar \omega \gamma}{\beta \eta_{in}} \left[ \frac{p}{1+p} (1+\xi)(1+\beta p) - \xi \beta p \right] \quad (3)$$

where  $\xi \equiv \frac{N_0 \beta V}{\gamma \tau_{sp}}$  is the cavity photon number at transparency. We substitute  $p = \alpha n_{ccd}$  into the cavity photon number and treat  $\beta$ ,  $\xi$ ,  $\eta_{in}$  and  $\alpha$  as fitting parameters. From the fit, we obtain  $\beta = 0.81 \pm 0.03$ , and  $\eta_{in} = 21.6 \pm 0.4\%$ . We obtain the lasing threshold by setting  $p = 1$  in Supplementary Equation 3 which gives  $P_{th} = P_{in}|_{p=1} = 0.97 \pm 0.03 \mu\text{W}$ .

### Supplementary Note 3: Device photostability

To demonstrate the stable performance of our lasing device, we conduct a measurement on another lasing device prepared by the same method as the measured one in the main text. The pump power is kept constant at 10  $\mu\text{W}$ , which is about 10 times above the threshold. From the Lorentzian fit of the acquired spectrum, we find cavity  $Q$  of 4,900 and a resonance wavelength of 664.5 nm at the beginning of our experiment. We record the output intensity as a function of time while the device is continually excited for 3.5 hours. As shown in Supplementary Figure 1, the output power from the device drops about 20 % compared to its initial value during this time period, which is likely due, at least in part, to drift in the collection

efficiency for our measurement system.

### **Supplementary References**

- 1 Björk, G. & Yamamoto, Y. Analysis of semiconductor microcavity lasers using rate equations. *IEEE J. Quant. Electron.* **27**, 2386-2396 (1991).
- 2 Pelton, M. Modified spontaneous emission in nanophotonic structures. *Nat. Photon.* **9**, 427-435 (2015).
- 3 Gérard, J. *et al.* Enhanced spontaneous emission by quantum boxes in a monolithic optical microcavity. *Phys. Rev. Lett.* **81**, 1110-1113 (1998).
